# Supplementary material
Source: publisher site journal article supplement (https://www.dovepress.com/article/288422)
Supplement: Supplementary file 1 [file get_supplementary_file.php]

## Supplementary materials

**Table S1: The clinicopathological parameters of 180 CRC cases of the tissue microarray used for immunohistochemistry analysis.**

<sup>a</sup>The tissue microarrays of colorectal cancer ( HCol-Ade180Sur-04 and HCol-Ade180Sur-08) are purchased from Shanghai Outdo Biotech, China.

<sup>b</sup>The positivity values are calculated using positive pixel count algorithm v 9.1 in Aperio ImageScope v12.1. The missing values are those spots lacking available areas. Epi, epithelial; Str, stromal. X-Tile v 3.6.1 was used to determine the cutoff to dichotomize into low (blue) and high (red) expression group for survival analysis. For clinicopathological parameter analysis, the cases were simply divided into lower-than-median and higher-than-median groups.

| Chip              | Tissue code <sup>a</sup> | Surgery time | Survival status | Follow-up time | Survival time (Month) | Loss to follow up | Sex | Age | Distant metastasis | Grade  | Tumor size  | Tumor size (cm <sup>3</sup> ) | Positive lymph node | T   | N   | M   | AJCC 7th stage | Cancer tissue <sup>b</sup> |           |           | Matched normal tissue <sup>b</sup> |           |           |
|-------------------|--------------------------|--------------|-----------------|----------------|-----------------------|-------------------|-----|-----|--------------------|--------|-------------|-------------------------------|---------------------|-----|-----|-----|----------------|----------------------------|-----------|-----------|------------------------------------|-----------|-----------|
|                   |                          |              |                 |                |                       |                   |     |     |                    |        |             |                               |                     |     |     |     |                | Full tissue spot           | Epi cells | Str cells | Full tissue spot                   | Epi cells | Str cells |
| HCol-Ade180Sur-04 | RDgCol0609A0294          | 2006.9       | Dead            | 2008/3/3       | 18                    |                   | M   | 48  | No                 | II-III | 5.5x4x2cm   | 44                            | 6                   | T3  | N2a | M0  | 3B             | 0.2653                     | 0.65      | 0.09      | 0.425                              | 0.42      | 0.38      |
| HCol-Ade180Sur-04 | RDgCol0706A0586          | 2007.5       | Alive           | 2015.7         | 98                    |                   | F   | 63  | No                 | II     | 4.5x4x1cm   | 18                            | 2                   | T3  | N1b | M0  | 3B             | 0.1739                     | n/a       | 0.13      | 0.196                              | 0.12      | 0.32      |
| HCol-Ade180Sur-04 | RDgCol0609A0283          | 2006.8       | Dead            | 2006/11/30     | 3                     |                   | F   | 73  | Peritoneum         | II-III | 5x3.5x3cm   | 52.5                          | 3                   | T3  | N1b | M1t | 4B             | 0.2623                     | 0.88      | 0.17      | 0.657                              | 0.66      | 0.57      |
| HCol-Ade180Sur-08 | RDgCol0710A0665          | 2007.8       | Alive           | 2015.7         | 95                    |                   | F   | 72  | No                 | II     | 4x4x1.5cm   | 24                            | 0                   | T3  | N0  | M0  | 2A             | 0.1865                     | 0.23      | 0.19      | 0.283                              | 0.3       | 0.5       |
| HCol-Ade180Sur-04 | RDgCol0701A0405          | 2007.1       | Dead            | 2008/1/7       | 12                    |                   | F   | 62  | No                 | III    | 10x10x9cm   | 900                           | 10                  | T3  | N2b | M0  | 3C             | 0.4389                     | 0.54      | 0.2       | 0.215                              | 0.21      | 0.36      |
| HCol-Ade180Sur-04 | RDgCol0705A0525          | 2007.4       | Alive           | 2015.7         | 99                    |                   | F   | 57  | No                 | II-III | 4.5x3x1cm   | 13.5                          | 1                   | T3  | N1a | M0  | 3B             | 0.3826                     | 0.76      | 0.21      | 0.212                              | 0.26      | 0.49      |
| HCol-Ade180Sur-04 | RDgCol0609A0278          | 2006.7       | Dead            | 2009/11/19     | 40                    |                   | M   | 75  | No                 | II-III | 2.5x2.5x1cm | 6.25                          |                     | T4b | N0  | M0  | 2C             | 0.2224                     | n/a       | 0.22      | 0.527                              | 0.53      | 0.68      |
| HCol-Ade180Sur-04 | RDgCol0706A0606          | 2007.5       | Alive           | 2015.7         | 98                    |                   | F   | 74  | No                 | II     | 6.5x6x4.5cm | 175.5                         | 0                   | T2  | N0  | M0  | 1              | 0.2929                     | 0.66      | 0.22      | 0.346                              | 0.25      | 0.43      |
| HCol-Ade180Sur-04 | RDgCol0704A0460          | 2007.3       | Dead            | 2012/5/23      | 62                    |                   | M   | 80  | No                 | II     | 8x5x5cm     | 200                           | 0                   | T3  | N0  | M0  | 2A             | 0.2909                     | 0.55      | 0.25      | 0.436                              | 0.27      | 0.54      |
| HCol-Ade180Sur-04 | RDgCol0704A0439          | 2007.2       | Alive           | 2015.7         | 101                   |                   | M   | 63  | No                 | II     | 9x8x8cm     | 576                           | 0                   | T3  | N0  | M0  | 2A             | 0.2406                     | 0.75      | 0.25      | 0.487                              | 0.64      | 0.5       |
| HCol-Ade180Sur-04 | RDgCol0704A0465          | 2007.3       | Dead            | 2010/4/22      | 37                    |                   | M   | 72  | No                 | II     | 10x10x8.2cm | 820                           | 1                   | T3  | N1a | M0  | 3B             | 0.3756                     | 0.76      | 0.25      | 0.351                              | 0.21      | 0.51      |
| HCol-Ade180Sur-04 | RDgCol0704A0431          | 2007.1       | Dead            | 2011/3/9       | 50                    |                   | M   | 62  | No                 | II     | 1-4x3x3cm   | 22.5                          | 0                   | T3  | N0  | M0  | 2A             | 0.4828                     | 0.43      | 0.27      | 0.19                               | 0.19      | 0.37      |
| HCol-Ade180Sur-08 | RDgCol0802A0937          | 2008.1       | Dead            | 2011/1/25      | 36                    |                   | F   | 67  | No                 | I-II   | 4x4x1.3cm   | 20.8                          | 0                   | T3  | N0  | M0  | 2A             | 0.5907                     | 0.73      | 0.28      | n/a                                | 0.03      | 0.13      |
| HCol-Ade180Sur-04 | RDgCol0704A0442          | 2007.2       | Dead            | 2012/12/17     | 70                    |                   | M   | 89  | No                 | II-III | 15x13x11cm  | 2145                          | 0                   | T3  | N0  | M0  | 2A             | 0.3649                     | 0.54      | 0.28      | 0.453                              | 0.58      | 0.6       |
| HCol-Ade180Sur-08 | RDgCol0710A0679          | 2007.9       | Alive           | 2015.7         | 94                    |                   | M   | 62  | No                 | II-III | 6x5x1.5cm   | 45                            | 0                   | T3  | N0  | M0  | 2A             | 0.3547                     | 0.47      | 0.29      | 0.366                              | 0.41      | 0.49      |
| HCol-Ade180Sur-08 | RDgCol0706A0616          | 2007.6       | Dead            | 2008/1/22      | 7                     |                   | F   | 74  | No                 | II-III | 10x5x1.5cm  | 75                            | 5                   | T3  | N2a | M0  | 3B             | 0.36                       | 0.45      | 0.29      | 0.226                              | 0.2       | 0.39      |
| HCol-Ade180Sur-08 | RDgCol0804A0983          | 2008.3       | Dead            | 2010/11/23     | 32                    |                   | F   | 71  | No                 | II     | 2.5x2.5x1cm | 6.25                          | 0                   | T3  | N0  | M0  | 2A             | 0.4855                     | 0.61      | 0.29      | 0.398                              | 0.26      | 0.14      |

|                   |                     |              |           |     |      |   |    |    |        |                        |      |   |               |        |      |      |       |      |      |
|-------------------|---------------------|--------------|-----------|-----|------|---|----|----|--------|------------------------|------|---|---------------|--------|------|------|-------|------|------|
| HCol-Ade180Sur-08 | RDgCol07<br>10A0667 | 2007.8 Alive | 2015.7    | 95  |      | M | 65 | No | II     | 4x3x1.5cm              | 18   | 2 | T4a N1b M0 3B | 0.4339 | 0.59 | 0.3  | 0.325 | 0.35 | 0.46 |
| HCol-Ade180Sur-04 | RDgCol07<br>04A0475 | 2007.2 Dead  | 2010/2/14 | 36  |      | M | 90 | No | II-III | 5x4x1cm                | 20   | 0 | T3 N0 M0 2A   | 0.3018 | n/a  | 0.3  | 0.217 | 0.21 | 0.58 |
| HCol-Ade180Sur-04 | RDgCol07<br>06A0607 | 2007.5 Alive | 2015.7    | 98  |      | M | 66 | No | II-III | —                      | —    | 0 | T3 N0 M0 2A   | 0.457  | 0.5  | 0.31 | 0.214 | 0.2  | 0.5  |
| HCol-Ade180Sur-04 | RDgCol07<br>04A0441 | 2007.2 Dead  | 2008/6/26 | 16  |      | F | 79 | No | II     | 6x6x5cm                | 180  | 2 | T4b N1b M0 3C | 0.5778 | 0.79 | 0.33 | 0.645 | 0.8  | 0.64 |
| HCol-Ade180Sur-08 | RDgCol08<br>01A0885 | 2007-1 Alive | 2014.5    | 78  | 2013 | F | 79 | No | I-III  | 4x3x1.5cm              | 18   | 0 | T3 N0 M0 2A   | 0.2873 | 0.35 | 0.33 | 0.375 | 0.4  | 0.51 |
| HCol-Ade180Sur-04 | RDgCol07<br>06A0597 | 2007.5 Alive | 2015.7    | 98  |      | F | 58 | No | II-III | 3.5x3x1cm              | 10.5 | 2 | T3 N1b M0 3B  | 0.5444 | 0.95 | 0.34 | 0.378 | 0.34 | 0.53 |
| HCol-Ade180Sur-04 | RDgCol06<br>09A0284 | 2006.8 Alive | 2015.7    | 107 |      | M | 71 | No | II     | 6x4x1.5cm              | 36   |   | T3 N0 M0 2A   | 0.5621 | 0.69 | 0.35 | 0.299 | 0.3  | 0.46 |
| HCol-Ade180Sur-04 | RDgCol07<br>04A0438 | 2007.1 Alive | 2015.7    | 102 |      | F | 70 | No | II     | 7x7x4cm                | 196  | 2 | T3 N1b M0 3B  | 0.4394 | 0.55 | 0.35 | 0.259 | 0.3  | 0.32 |
| HCol-Ade180Sur-04 | RDgCol07<br>06A0609 | 2007.5 Dead  | 2008/7/29 | 14  |      | M | 62 | No | II-III | 6x5x1.3cm              | 39   | 4 | T3 N2a M0 3B  | 0.4941 | 0.58 | 0.35 | 0     | 0.69 | 0.28 |
| HCol-Ade180Sur-04 | RDgCol07<br>06A0575 | 2007.4 Alive | 2015.7    | 99  |      | M | 62 | No | II     | 2.3x2x<br>0.5cm        | 2.3  | 0 | T2 N0 M0 1    | 0.4587 | 0.52 | 0.36 | 0.427 | 0.55 | 0.52 |
| HCol-Ade180Sur-04 | RDgCol07<br>04A0453 | 2007.3 Dead  | 2008/5/29 | 14  |      | F | 84 | No | II-III | 6x5x5cm                | 150  | 1 | T3 N1a M0 3B  | 0.4457 | 0.82 | 0.36 | 0.489 | 0.3  | 0.62 |
| HCol-Ade180Sur-08 | RDgCol08<br>03A0955 | 2008.3 Alive | 2015.7    | 88  |      | F | 54 | No | II     | 3.3x2.7x<br>1cm        | 8.91 | 0 | T2 N0 M0 1    | 0.2949 | 0.34 | 0.36 | n/a   | n/a  | n/a  |
| HCol-Ade180Sur-04 | RDgCol07<br>05A0535 | 2007.4 Alive | 2015.7    | 99  |      | M | 74 | No | II     | 5x4x1.5cm              | 30   | 0 | T3 N0 M0 2A   | 0.374  | 0.47 | 0.37 | 0.294 | 0.28 | 0.42 |
| HCol-Ade180Sur-04 | RDgCol06<br>09A0296 | 2006.9 Dead  | 2011/4/12 | 55  |      | M | 80 | No | II     | 4x3x1.5, 2x<br>1.7x1cm | 21.4 |   | T3 N0 M0 2A   | 0.5788 | 0.72 | 0.37 | 0     | 0    | 0.14 |
| HCol-Ade180Sur-04 | RDgCol07<br>04A0436 | 2007.1 Alive | 2015.7    | 102 |      | F | 成  | No | II-III | 3.5x2x2cm              | 14   | 0 | T3 N0 M0 2A   | 0.399  | 0.38 | 0.38 | 0.243 | 0.24 | 0.39 |
| HCol-Ade180Sur-08 | RDgCol07<br>09A0652 | 2007.7 Alive | 2015.7    | 96  |      | M | 80 | No | I-II   | 4.5x4x<br>1.5cm        | 27   | 0 | T3 N0 M0 2A   | 0.5128 | 0.67 | 0.38 | 0.33  | 0.37 | 0.42 |
| HCol-Ade180Sur-08 | RDgCol07<br>10A0668 | 2007.8 Alive | 2015.7    | 95  |      | M | 61 | No | I-II   | 7x5x1.5cm              | 52.5 | 0 | T4a N0 M0 2B  | 0.4223 | 0.54 | 0.38 | 0.314 | 0.34 | 0.44 |
| HCol-Ade180Sur-08 | RDgCol08<br>01A0891 | 2008.1 Dead  | 2009/5/4  | 16  |      | F | 52 | No | III    | 9x6x1.5cm              | 81   | 4 | T3 N2a M0 3B  | 0.5286 | 0.69 | 0.38 | 0.369 | 0.43 | 0.46 |
| HCol-Ade180Sur-08 | RDgCol07<br>10A0672 | 2007.9 Alive | 2015.7    | 94  |      | F | 55 | No | II     | 3x2x1.8cm              | 10.8 | 0 | T3 N0 M0 2A   | 0.4234 | 0.58 | 0.39 | 0.269 | 0.27 | 0.49 |
| HCol-Ade180Sur-04 | RDgCol07<br>06A0592 | 2007.5 Alive | 2015.7    | 98  |      | F | 70 | No | II     | 2.2x2x1cm              | 4.4  | 0 | T3 N0 M0 2A   | 0.4055 | 0.79 | 0.39 | 0.631 | 0.82 | 0.66 |
| HCol-Ade180Sur-08 | RDgCol07<br>12A0828 | 2007-1 Dead  | 2011/7/12 | 44  |      | M | 72 | No | I-II   | 6x3x1cm                | 18   | 1 | T3 N1a M0 3B  | 0.5612 | 0.72 | 0.39 | n/a   | n/a  | 0.18 |
| HCol-Ade180Sur-08 | RDgCol08<br>01A0880 | 2007-1 Alive | 2015.7    | 91  |      | M | 72 | No | II     | 3x2.5x<br>1.8cm        | 13.5 | 0 | T1 N0 M0 1    | 0.5347 | 0.67 | 0.39 | 0.273 | 0.27 | 0.41 |
| HCol-Ade180Sur-04 | RDgCol07<br>05A0531 | 2007.4 Alive | 2015.7    | 99  |      | M | 80 | No | III    | 10x6x1cm               | 60   | 2 | T3 N1b M0 3B  | 0.4699 | 0.63 | 0.39 | 0.316 | 0.3  | 0.45 |
| HCol-Ade180Sur-08 | RDgCol08<br>03A0962 | 2008.3 Dead  | 2013/9/23 | 66  |      | F | 62 | No | II     | 5x3.5x1cm              | 17.5 | 0 | T3 N0 M0 2A   | 0.5411 | 0.68 | 0.39 | 0.278 | 0.28 | 0.4  |

|                   |                     |              |           |     |      |    |    |        |                                   |           |      |               |              |        |      |       |       |      |     |
|-------------------|---------------------|--------------|-----------|-----|------|----|----|--------|-----------------------------------|-----------|------|---------------|--------------|--------|------|-------|-------|------|-----|
| HCol-Ade180Sur-08 | RDgCol07<br>12A0827 | 2007-1 Alive | 2015.7    | 92  | F    | 86 | No | II     | 6x4.5x<br>1.5cm                   | 40.5      | 0    | T3 N0 M0 2A   | 0.4213       | 0.54   | 0.4  | 0.358 | 0.39  | 0.47 |     |
| HCol-Ade180Sur-04 | RDgCol06<br>11A0310 | 2006.9 Dead  | 2007/2/19 | 5   | F    | 73 | No | III    | 6x5x3cm                           | 90        | 6    | T3 N2a M0 3B  | 0.4917       | 0.81   | 0.4  | 0.398 | 0.4   | 0.43 |     |
| HCol-Ade180Sur-04 | RDgCol06<br>11A0312 | 2006.9 Alive | 2015.7    | 106 | M    | 80 | No | II-III | 5x4.5x1cm                         | 22.5      | 0    | T3 N0 M0 2A   | 0.4614       | 0.45   | 0.4  | 0.37  | 0.37  | 0.42 |     |
| HCol-Ade180Sur-08 | RDgCol08<br>03A0967 | 2008.3 Dead  | 2011/3/1  | 36  | F    | 65 | No | II     | 5x5x1.5cm                         | 37.5      | 4    | T3 N2a M0 3B  | 0.464        | 0.59   | 0.4  | 0.401 | 0.43  | 0.54 |     |
| HCol-Ade180Sur-04 | RDgCol07<br>04A0466 | 2007.3 Alive | 2015.7    | 100 | M    | 62 | No | II     | 6x6x3cm                           | 108       | 0    | T3 N0 M0 2A   | 0.4325       | 0.56   | 0.4  | 0.308 | 0.57  | 0.6  |     |
| HCol-Ade180Sur-04 | RDgCol07<br>06A0585 | 2007.5 Alive | 2015.7    | 98  | M    | 47 | No | I      | 3x2x1.5cm                         | 9         | 0    | T1 N0 M0 1    | 0.3481       | 0.43   | 0.4  | 0.421 | 0.33  | 0.61 |     |
| HCol-Ade180Sur-08 | RDgCol07<br>06A0619 | 2007.6 Alive | 2015.7    | 97  | M    | 62 | No | I-II   | 7x6x1.5cm                         | 63        | 0    | T3 N0 M0 2A   | 0.5299       | 0.7    | 0.4  | 0.29  | 0.32  | 0.43 |     |
| HCol-Ade180Sur-08 | RDgCol07<br>10A0675 | 2007.9 Alive | 2015.7    | 94  | M    | 85 | No | II     | 7x3x1.5cm                         | 31.5      | 1    | T3 N1a M0 3B  | 0.5903       | 0.75   | 0.41 | 0.389 | 0.4   | 0.58 |     |
| HCol-Ade180Sur-08 | RDgCol07<br>12A0835 | 2007-1 Alive | 2015.7    | 91  | M    | 51 | No | II     | 2x1.5x1cm                         | 3         | 1    | T3 N1a M0 3B  | 0.442        | 0.57   | 0.41 | 0.301 | 0.34  | 0.4  |     |
| HCol-Ade180Sur-08 | RDgCol08<br>03A0953 | 2008.3 Dead  | 2011/5/31 | 38  | M    | 65 | No | I      | 6x5x2cm                           | 60        | 0    | T4b N0 M0 2C  | 0.6185       | 0.77   | 0.41 | 0.344 | 0.38  | 0.55 |     |
| HCol-Ade180Sur-08 | RDgCol07<br>06A0617 | 2007.6 Dead  | 2008/8/24 | 14  | F    | 81 | No | II     | 4.5x4x<br>1.5cm                   | 27        | 0    | T3 N0 M0 2A   | 0.4707       | 0.57   | 0.41 | 0.402 | 0.43  | 0.55 |     |
| HCol-Ade180Sur-08 | RDgCol07<br>12A0829 | 2007-1 Dead  | 2010/4/14 | 29  | M    | 65 | No | II     | 7x5x2cm                           | 70        | 1    | T4a N1a M0 3B | 0.5602       | 0.69   | 0.41 | 0.351 | 0.37  | 0.48 |     |
| HCol-Ade180Sur-08 | RDgCol07<br>09A0646 | 2007.7 Dead  | 2011/2/6  | 43  | M    | 57 | No | II     | 6x3x1cm                           | 18        | 0    | T3 N0 M0 2A   | 0.4848       | 0.61   | 0.42 | 0.394 | 0.42  | 0.52 |     |
| HCol-Ade180Sur-08 | RDgCol07<br>12A0825 | 2007-1 Alive | 2015.7    | 92  | M    | 51 | No | I-II   | 5x5x1cm                           | 25        | 0    | T3 N0 M0 2A   | 0.481        | 0.6    | 0.42 | 0.296 | 0.3   | 0.41 |     |
| HCol-Ade180Sur-04 | RDgCol07<br>04A0435 | 2007.1 Dead  | 2008/5/14 | 16  | M    | 成  | No | II-III | 5.5x4.5x<br>3.5cm                 | 86.63     | 0    | T3 N0 M0 2A   | 0.6719       | 0.73   | 0.43 | 0.178 | 0.12  | 0.3  |     |
| HCol-Ade180Sur-08 | RDgCol07<br>06A0615 | 2007.6 Dead  | 2010/2/18 | 32  | F    | 78 | No | II     | 6x5x1.5cm                         | 45        | 0    | T4a N0 M0 2B  | 0.588        | 0.71   | 0.43 | 0.3   | 0.31  | 0.37 |     |
| HCol-Ade180Sur-04 | RDgCol07<br>05A0539 | 2007.4 Dead  | 2008/7/25 | 15  | F    | 71 | No | II-III | 5x4x1.3cm,<br>5x3.5x1cm<br>15x10x | 43.5      | 4    | T3 N2a M0 3B  | 0.6191       | 0.88   | 0.43 | 0.24  | 0.34  | 0.53 |     |
| HCol-Ade180Sur-04 | RDgCol07<br>04A0452 | 2007.3 Dead  | 2008/1/22 | 10  | F    | 67 | No | II     | 10cm, 2x2x<br>1.5cm               | 1506      | 1    | T4a N1a M0 3B | 0.5465       | 0.91   | 0.43 | 0.41  | 0.49  | 0.47 |     |
| HCol-Ade180Sur-08 | RDgCol08<br>03A0960 | 2008.3 Alive | 2015.7    | 88  | F    | 54 | No | I-II   | 3x3x0.8cm                         | 7.2       | 3    | T3 N1b M0 3B  | 0.5959       | 0.75   | 0.43 | 0.337 | 0.39  | 0.47 |     |
| HCol-Ade180Sur-04 | RDgCol06<br>09A0295 | 2006.9 Dead  | 2010/12/5 | 51  | F    | 24 | No | II-III | 3.5x3x1cm                         | 10.5      | 4    | T3 N2a M0 3B  | 0.4313       | 0.5    | 0.43 | 0.531 | 0.53  | 0.53 |     |
| HCol-Ade180Sur-08 | RDgCol08<br>04A0989 | 2008.4 Dead  | 2008/8/1  | 4   | F    | 76 | No | III    | 6x4.5x1cm                         | 27        | 2    | T3 N1b M0 3B  | 0.5306       | 0.67   | 0.43 | 0.379 | 0.35  | 0.54 |     |
| HCol-Ade180Sur-04 | RDgCol06<br>09A0297 | 2006.9 Dead  | 2008/9/30 | 24  | M    | 75 | No | II     | 7x6x2cm                           | 84        | 2    | T4a N1b M0 3B | 0.4426       | 0.41   | 0.43 | 0.383 | 0.38  | 0.42 |     |
| HCol-Ade180Sur-04 | RDgCol07<br>05A0534 | 2007.4 Alive | 2012/8/16 | 64  | 2013 | F  | 60 | No     | II                                | 4x2x1.3cm | 10.4 | 2             | T3 N1b M0 3B | 0.4599 | 0.68 | 0.43  | 0.299 | 0.54 | 0.5 |

|                   |                 |              |            |     |      |    |    |        |                              |           |    |              |             |        |      |       |       |      |      |
|-------------------|-----------------|--------------|------------|-----|------|----|----|--------|------------------------------|-----------|----|--------------|-------------|--------|------|-------|-------|------|------|
| HCol-Ade180Sur-08 | RDgCol0803A0963 | 2008.3 Alive | 2015.7     | 88  | M    | 74 | No | II     | 5x4.5x1.5cm                  | 33.75     | 1  | T3 N1aM0 3B  | 0.5666      | 0.7    | 0.44 | 0.355 | 0.38  | 0.5  |      |
| HCol-Ade180Sur-04 | RDgCol0609A0287 | 2006.8 Alive | 2015.7     | 107 | M    | 55 | No | II-III | 7.5x4.5x2.5cm                | 84.38     |    | T3 N0 M0 2A  | 0.7061      | 0.77   | 0.44 | 0.339 | 0.34  | 0.47 |      |
| HCol-Ade180Sur-08 | RDgCol0712A0830 | 2007-1 Dead  | 2008/10/4  | 11  | M    | 80 | No | II     | 5x4x1.5cm                    | 30        | 3  | T3 N1bM0 3B  | 0.4096      | 0.52   | 0.44 | 0.286 | 0.3   | 0.49 |      |
| HCol-Ade180Sur-04 | RDgCol0704A0451 | 2007.3 Alive | 2012/8/16  | 65  | 2013 | F  | 68 | No     | III                          | 3.5x3x2cm | 21 | 0            | T3 N0 M0 2A | 0.6062 | 0.89 | 0.44  | 0.257 | 0.17 | 0.33 |
| HCol-Ade180Sur-04 | RDgCol0704A0457 | 2007.3 Alive | 2012/8/16  | 65  | 2013 | M  | 65 | No     | II                           | 4.5x4x1cm | 18 | 0            | T3 N0 M0 2A | 0.3493 | 0.24 | 0.44  | 0.403 | 0.54 | 0.44 |
| HCol-Ade180Sur-08 | RDgCol0711A0781 | 2007-1 Alive | 2015.7     | 92  | M    | 75 | No | II     | 4x4x1cm                      | 16        | 0  | T4a N0 M0 2B | 0.5815      | 0.74   | 0.45 | n/a   | n/a   | n/a  |      |
| HCol-Ade180Sur-08 | RDgCol0710A0673 | 2007.9 Alive | 2015.7     | 94  | M    | 68 | No | II     | 3.5x3x1cm                    | 10.5      | 0  | T2 N0 M0 1   | 0.54        | 0.66   | 0.45 | 0.368 | 0.36  | n/a  |      |
| HCol-Ade180Sur-04 | RDgCol0609A0298 | 2006.9 Alive | 2015.7     | 106 | F    | 59 | No | II-III | 4.5x3x1.5cm                  | 20.25     | 0  | T3 N0 M0 2A  | 0.4363      | 0.45   | 0.45 | 0.207 | 0.21  | 0.35 |      |
| HCol-Ade180Sur-08 | RDgCol0801A0890 | 2008.1 Dead  | 2009/2/24  | 13  | M    | 65 | No | II-III | 6x4.5x1.5cm                  | 40.5      | 1  | T3 N1aM0 3B  | 0.339       | 0.4    | 0.45 | 0.339 | 0.39  | 0.48 |      |
| HCol-Ade180Sur-08 | RDgCol0802A0943 | 2008.2 Dead  | 2009/12/13 | 22  | M    | 60 | No | II     | 5x4x1cm                      | 20        | 1  | T3 N1aM0 3B  | 0.5024      | 0.59   | 0.45 | n/a   | n/a   | 0.03 |      |
| HCol-Ade180Sur-08 | RDgCol0710A0676 | 2007.9 Alive | 2015.7     | 94  | F    | 63 | No | II     | 6x4x1.5cm                    | 36        | 0  | T3 N0 M0 2A  | 0.5691      | 0.72   | 0.45 | 0.379 | 0.41  | n/a  |      |
| HCol-Ade180Sur-08 | RDgCol0710A0671 | 2007.9 Dead  | 2010/12/1  | 39  | M    | 67 | No | II     | 5x4x1cm                      | 20        | 0  | T3 N0 M0 2A  | 0.5258      | 0.67   | 0.45 | 0.369 | 0.4   | 0.48 |      |
| HCol-Ade180Sur-08 | RDgCol0709A0654 | 2007.8 Dead  | 2009/12/12 | 28  | F    | 73 | No | II     | 3x2x1cm                      | 6         | 0  | T3 N1cM0 3B  | 0.5371      | 0.67   | 0.45 | 0.295 | 0.31  | 0.5  |      |
| HCol-Ade180Sur-04 | RDgCol0705A0530 | 2007.4 Alive | 2015.7     | 99  | F    | 84 | No | II     | 2x2x1.5cm                    | 6         | 0  | T2 N0 M0 1   | 0.6377      | 0.71   | 0.45 | 0.356 | 0.4   | 0.45 |      |
| HCol-Ade180Sur-04 | RDgCol0609A0285 | 2006.8 Dead  | 2011/3/23  | 55  | F    | 70 | No | II-III | 5.5x4.5x0.7cm                | 17.33     | 1  | T3 N1aM0 3B  | 0.5364      | 0.87   | 0.45 | 0.252 | 0.25  | 0.38 |      |
| HCol-Ade180Sur-04 | RDgCol0705A0532 | 2007.4 Alive | 2015.7     | 99  | F    | 65 | No | II     | 5.5x4x1cm                    | 22        | 0  | T3 N0 M0 2A  | 0.4537      | 0.49   | 0.46 | 0.302 | 0.36  | 0.55 |      |
| HCol-Ade180Sur-08 | RDgCol0712A0834 | 2007-1 Alive | 2015.7     | 91  | M    | 78 | No | II     | ①4.5x3.5x1cm; ②1.5x0.8x0.8cm | 16.71     | 0  | T3 N0 M0 2A  | 0.5846      | 0.74   | 0.46 | n/a   | 0.06  | 0.09 |      |
| HCol-Ade180Sur-08 | RDgCol0711A0775 | 2007-1 Dead  | 2009/2/16  | 16  | M    | 62 | No | II     | 9x3x3cm                      | 81        | 3  | T3 N1bM0 3B  | 0.5017      | 0.61   | 0.46 | 0.299 | 0.3   | 0.45 |      |
| HCol-Ade180Sur-04 | RDgCol0705A0543 | 2007.4 Dead  | 2010/2/25  | 34  | F    | 63 | No | II     | 3.5x3x1.5cm                  | 15.75     | 1  | T3 N1aM0 3B  | 0.4615      | n/a    | 0.46 | 0.351 | 0.33  | 0.63 |      |
| HCol-Ade180Sur-08 | RDgCol0804A0974 | 2008.3 Alive | 2015.7     | 88  | M    | 75 | No | II     | 3x3x1cm                      | 9         | 1  | T3 N1aM0 3B  | 0.4859      | 0.59   | 0.46 | 0.361 | 0.39  | 0.53 |      |
| HCol-Ade180Sur-08 | RDgCol0709A0641 | 2007.6 Dead  | 2011/6/25  | 47  | M    | 74 | No | II     | 4.5x3x1.5cm                  | 20.25     | 0  | T3 N0 M0 2A  | 0.5732      | 0.73   | 0.46 | 0.333 | 0.36  | 0.45 |      |
| HCol-Ade180Sur-08 | RDgCol0709A0655 | 2007.8 Alive | 2015.7     | 95  | F    | 47 | No | II     | 9x4.5x1.5cm                  | 60.75     | 7  | T3 N2bM0 3C  | 0.4991      | 0.61   | 0.46 | n/a   | 0.17  | n/a  |      |
| HCol-Ade180Sur-08 | RDgCol0804A0977 | 2008.3 Alive | 2015.7     | 88  | M    | 70 | No | I      | 4.5x3x1cm                    | 13.5      | 0  | T3 N0 M0 2A  | 0.6045      | 0.75   | 0.47 | 0.446 | 0.48  | 0.6  |      |

|                   |                 |              |            |     |   |    |    |        |             |       |   |               |        |      |      |       |      |      |
|-------------------|-----------------|--------------|------------|-----|---|----|----|--------|-------------|-------|---|---------------|--------|------|------|-------|------|------|
| HCol-Ade180Sur-08 | RDgCol0801A0888 | 2008.1 Dead  | 2015/6/12  | 89  | M | 71 | No | I-III  | 5x5x0.5cm   | 12.5  | 4 | T3 N2a M0 3B  | 0.6147 | 0.76 | 0.47 | 0.383 | 0.41 | 0.54 |
| HCol-Ade180Sur-04 | RDgCol0704A0463 | 2007.3 Dead  | 2010/11/2  | 44  | M | 67 | No | II-III | 3.5x3x2cm   | 21    | 3 | T3 N1b M0 3B  | 0.6331 | 0.69 | 0.47 | 0.415 | 0.45 | 0.54 |
| HCol-Ade180Sur-08 | RDgCol0801A0881 | 2007-1 Dead  | 2009/1/9   | 13  | F | 72 | No | II     | 4x3.5x2.5cm | 35    |   | T3 N0 M0 2A   | 0.5408 | 0.69 | 0.47 | 0.37  | 0.41 | 0.49 |
| HCol-Ade180Sur-04 | RDgCol0705A0533 | 2007.4 Dead  | 2010/2/5   | 34  | F | 76 | No | II     | 8x4.5x2cm   | 72    | 0 | T3 N0 M0 2A   | 0.5045 | 0.59 | 0.47 | 0.357 | 0.65 | 0.57 |
| HCol-Ade180Sur-04 | RDgCol0706A0579 | 2007.5 Dead  | 2007/11/29 | 6   | F | 73 | No | II     | 5x4x1.3cm   | 26    | 0 | T3 N1c M0 3B  | 0.5698 | 0.81 | 0.47 | 0.444 | 0.46 | 0.63 |
| HCol-Ade180Sur-08 | RDgCol0803A0956 | 2008.3 Alive | 2015.7     | 88  | F | 79 | No | I-III  | 5x4x1.5cm   | 30    | 0 | T3 N0 M0 2A   | 0.4932 | 0.6  | 0.48 | 0.367 | 0.42 | 0.51 |
| HCol-Ade180Sur-08 | RDgCol0709A0649 | 2007.7 Dead  | 2009/10/30 | 27  | F | 50 | No | II-III | 2.5x2x1cm   | 5     | 4 | T4a N2a M0 3C | 0.4732 | 0.56 | 0.48 | 0.286 | 0.27 | 0.47 |
| HCol-Ade180Sur-08 | RDgCol0712A0833 | 2007-1 Dead  | 2010/7/24  | 31  | F | 60 | No | II     | 4x3x3cm     | 36    | 0 | T3 N0 M0 2A   | 0.5374 | 0.72 | 0.48 | 0.425 | 0.46 | 0.56 |
| HCol-Ade180Sur-08 | RDgCol0706A0628 | 2007.6 Alive | 2015.7     | 97  | M | 53 | No | II     | 5x5x1cm     | 25    | 1 | T3 N1a M0 3B  | 0.4815 | 0.58 | 0.48 | 0.247 | 0.05 | 0.37 |
| HCol-Ade180Sur-08 | RDgCol0706A0627 | 2007.6 Dead  | 2008/3/20  | 9   | F | 54 | No | I-II   | 4x3x1cm     | 12    | 0 | T3 N0 M0 2A   | 0.5677 | 0.7  | 0.48 | 0.328 | 0.34 | 0.55 |
| HCol-Ade180Sur-04 | RDgCol0609A0292 | 2006.9 Alive | 2015.7     | 106 | M | 85 | No | II-III | 4x4x2.5cm   | 40    | 0 | — N0 M0 —     | 0.3633 | 0.36 | 0.48 | 0.268 | 0.27 | 0.41 |
| HCol-Ade180Sur-04 | RDgCol0705A0544 | 2007.4 Alive | 2015.7     | 99  | M | 58 | No | I-II   | 5x5x1.5cm   | 37.5  | 0 | T3 N0 M0 2A   | 0.486  | 0.5  | 0.49 | 0.278 | 0.23 | 0.36 |
| HCol-Ade180Sur-08 | RDgCol0803A0952 | 2008.3 Alive | 2015.7     | 88  | F | 64 | No | II     | 3.5x2.7x1cm | 9.45  | 0 | T3 N0 M0 2A   | 0.5943 | 0.72 | 0.49 | n/a   | 0.02 | n/a  |
| HCol-Ade180Sur-04 | RDgCol0704A0447 | 2007.2 Dead  | 2011/6/26  | 52  | F | 80 | No | II     | 4x4x1.5cm   | 24    | 0 | T3 N0 M0 2A   | 0.7521 | 0.87 | 0.49 | 0     | 0.51 | 0.44 |
| HCol-Ade180Sur-08 | RDgCol0709A0656 | 2007.8 Alive | 2015.7     | 95  | M | 68 | No | I      | 4x6x5cm     | 120   | 0 | T3 N0 M0 2A   | 0.374  | 0.42 | 0.49 | 0.419 | 0.45 | 0.57 |
| HCol-Ade180Sur-04 | RDgCol0705A0541 | 2007.4 Dead  | 2009/4/19  | 24  | F | 67 | No | II-III | 4x3x1.5cm   | 18    | 2 | T3 N1b M0 3B  | 0.4212 | 0.75 | 0.49 | 0.34  | 0.45 | 0.57 |
| HCol-Ade180Sur-08 | RDgCol0803A0954 | 2008.3 Dead  | 2009/9/29  | 18  | M | 83 | No | II     | 10x7x1.5cm  | 105   | 2 | T4a N1b M0 3B | 0.5922 | 0.74 | 0.49 | 0.345 | 0.31 | 0.43 |
| HCol-Ade180Sur-08 | RDgCol0709A0642 | 2007.7 Alive | 2015.7     | 96  | F | 70 | No | I-II   | 9x6x1cm     | 54    | 0 | T3 N0 M0 2A   | 0.52   | 0.63 | 0.49 | 0.421 | 0.44 | 0.58 |
| HCol-Ade180Sur-04 | RDgCol0704A0476 | 2007.2 Dead  | 2007/7/15  | 5   | M | 48 | No | III    | 8x7x3cm     | 168   | 0 | T4b N0 M0 2C  | 0.5426 | 0.66 | 0.49 | 0.486 | 0.56 | 0.5  |
| HCol-Ade180Sur-08 | RDgCol0803A0957 | 2008.3 Alive | 2015.7     | 88  | F | 60 | No | II     | 6x3.5x1.5cm | 31.5  | 0 | T3 N0 M0 2A   | 0.4914 | 0.59 | 0.49 | 0.3   | 0.29 | 0.47 |
| HCol-Ade180Sur-04 | RDgCol0704A0461 | 2007.3 Alive | 2015.7     | 100 | F | 79 | No | II     | 3x3x2cm     | 18    | 2 | T3 N1b M0 3B  | 0.4775 | 0.5  | 0.5  | 0.306 | 0.17 | 0.42 |
| HCol-Ade180Sur-08 | RDgCol0803A0959 | 2008.3 Alive | 2015.7     | 88  | F | 50 | No | I-II   | 3x2.5x1cm   | 7.5   | 1 | T3 N1a M0 3B  | 0.5531 | 0.69 | 0.5  | 0.209 | 0.23 | 0.34 |
| HCol-Ade180Sur-04 | RDgCol0706A0589 | 2007.5 Dead  | 2008/8/6   | 15  | M | 63 | No | II     | 7.5x5.5x2cm | 82.5  | 0 | T3 N0 M0 2A   | 0.6162 | 0.66 | 0.5  | 0.241 | 0.22 | 0.47 |
| HCol-Ade180Sur-04 | RDgCol0705A0524 | 2007.3 Alive | 2015.7     | 100 | F | 82 | No | I      | 9x5.5x3cm   | 148.5 | 0 | T2 N0 M0 1    | 0.539  | 0.71 | 0.5  | 0.259 | 0.34 | 0.44 |

|                   |                     |              |            |    |      |   |    |    |        |                            |       |   |              |        |      |      |       |      |      |
|-------------------|---------------------|--------------|------------|----|------|---|----|----|--------|----------------------------|-------|---|--------------|--------|------|------|-------|------|------|
| HCol-Ade180Sur-08 | RDgCol07<br>11A0782 | 2007.1 Dead  | 2014/2/3   | 75 |      | M | 70 | No | II     | 6.5x4.5x<br>1.5cm          | 43.88 | 0 | T2 N0 M0 1   | 0.4587 | 0.55 | 0.5  | 0.345 | 0.35 | 0.5  |
| HCol-Ade180Sur-04 | RDgCol07<br>04A0440 | 2007.2 Dead  | 2008/10/6  | 20 |      | M | 74 | No | II     | 15x13x<br>11cm             | 2145  | 1 | T2 N1aM0 3A  | 0.5395 | 0.66 | 0.5  | 0.251 | 0.3  | 0.4  |
| HCol-Ade180Sur-08 | RDgCol07<br>06A0622 | 2007.6 Alive | 2015.7     | 97 |      | M | 76 | No | II     | 5x4x1cm                    | 20    | 0 | T4a N0 M0 2B | 0.569  | 0.71 | 0.5  | 0.426 | 0.46 | 0.57 |
| HCol-Ade180Sur-04 | RDgCol07<br>06A0584 | 2007.5 Alive | 2015.7     | 98 |      | M | 55 | No | I-II   | 6x5x1.5cm                  | 45    | 0 | T3 N0 M0 2A  | 0.699  | 0.91 | 0.5  | 0.221 | 0.15 | 0.5  |
| HCol-Ade180Sur-04 | RDgCol07<br>04A0449 | 2007.1 Alive | 2012/8/16  | 67 | 2013 | M | 78 | No | II     | 2-1.2x1.5x<br>1.5cm        | 3.6   |   | T4a N0 M0 2B | 0.5909 | 0.79 | 0.5  | 0.176 | 0.14 | 0.35 |
| HCol-Ade180Sur-08 | RDgCol07<br>06A0624 | 2007.6 Dead  | 2010/10/9  | 40 |      | F | 60 | No | I-II   | 7x6x4cm                    | 168   | 0 | T3 N0 M0 2A  | 0.6105 | 0.75 | 0.5  | 0.434 | 0.47 | 0.56 |
| HCol-Ade180Sur-08 | RDgCol07<br>09A0645 | 2007.7 Dead  | 2015/2/3   | 91 |      | F | 76 | No | II     | 4x2x0.6cm                  | 4.8   | 0 | T3 N0 M0 2A  | 0.57   | 0.7  | 0.51 | 0.329 | 0.36 | 0.48 |
| HCol-Ade180Sur-04 | RDgCol07<br>04A0437 | 2007.1 Dead  | 2008/7/10  | 18 |      | F | 71 | No | II-III | 7x7x4cm                    | 196   | 0 | T2 N0 M0 1   | 0.7146 | 0.92 | 0.51 | 0.516 | 0.7  | 0.52 |
| HCol-Ade180Sur-08 | RDgCol08<br>02A0945 | 2008.2 Alive | 2015.7     | 89 |      | F | 69 | No | II     | 2.8x2.5x<br>1cm            | 7     | 0 | T4b N0 M0 2C | 0.4916 | 0.59 | 0.52 | 0.336 | 0.36 | 0.48 |
| HCol-Ade180Sur-08 | RDgCol07<br>11A0777 | 2007-1 Alive | 2015.7     | 93 |      | M | 75 | No | II     | 5x5x4cm                    | 100   | 0 | T3 N0 M0 2A  | 0.5652 | 0.74 | 0.52 | 0.345 | 0.35 | 0.47 |
| HCol-Ade180Sur-08 | RDgCol07<br>10A0663 | 2007-9 Dead  | 2009/1/15  | 16 |      | F | 78 | No | II     | 4x3x1.5cm                  | 18    | 0 | T3 N0 M0 2A  | 0.4589 | 0.72 | 0.52 | 0.337 | 0.38 | 0.43 |
| HCol-Ade180Sur-08 | RDgCol07<br>09A0640 | 2007.6 Alive | 2015.7     | 97 |      | M | 74 | No | II     | 5x4x1cm                    | 20    | 0 | T3 N0 M0 2A  | 0.5708 | 0.7  | 0.52 | 0.364 | 0.36 | 0.52 |
| HCol-Ade180Sur-08 | RDgCol07<br>09A0648 | 2007.7 Alive | 2015.7     | 96 |      | M | 65 | No | II-III | 9x6x1.5cm                  | 81    | 0 | T3 N0 M0 2A  | 0.5803 | 0.73 | 0.52 | 0.352 | 0.38 | 0.51 |
| HCol-Ade180Sur-08 | RDgCol07<br>11A0779 | 2007-1 Dead  | 2008/3/27  | 5  |      | F | 83 | No | II-III | 5x4.5x2cm                  | 45    | 0 | T3 N0 M0 2A  | 0.6276 | 0.77 | 0.52 | 0.422 | 0.48 | 0.55 |
| HCol-Ade180Sur-08 | RDgCol07<br>11A0778 | 2007-1 Alive | 2015.7     | 93 |      | M | 58 | No | II     | 4x3x1cm                    | 12    | 1 | T3 N1aM0 3B  | 0.6124 | 0.74 | 0.53 | 0.334 | 0.35 | 0.49 |
| HCol-Ade180Sur-08 | RDgCol07<br>10A0681 | 2007.9 Alive | 2015.7     | 94 |      | F | 78 | No | II     | 3.5x2x1cm                  | 7     | 0 | T3 N0 M0 2A  | 0.5305 | 0.66 | 0.53 | 0.335 | 0.37 | 0.45 |
| HCol-Ade180Sur-08 | RDgCol07<br>06A0626 | 2007.6 Alive | 2015.7     | 97 |      | M | 61 | No | II     | 6x4.5x<br>1.5cm            | 40.5  | 1 | T3 N1aM0 3B  | 0.5999 | 0.75 | 0.53 | 0.35  | 0.39 | 0.5  |
| HCol-Ade180Sur-08 | RDgCol07<br>09A0653 | 2007.7 Dead  | 2007/9/11  | 2  |      | F | 70 | No | II     | 5x4.5x<br>1.5cm            | 33.75 | 4 | T3 N2aM0 3B  | 0.6239 | 0.75 | 0.53 | 0.418 | 0.47 | 0.53 |
| HCol-Ade180Sur-08 | RDgCol07<br>10A0666 | 2007.8 Dead  | 2008/4/22  | 8  |      | M | 90 | No | II     | 5x2.5x1cm                  | 12.5  | 2 | T3 N1bM0 3B  | 0.6287 | 0.76 | 0.53 | 0.433 | 0.47 | 0.57 |
| HCol-Ade180Sur-04 | RDgCol07<br>06A0588 | 2007.5 Dead  | 2010/6/24  | 37 |      | M | 66 | No | II     | 2.5x2x1cm                  | 5     | 0 | T4a N0 M0 2B | 0.6102 | 0.59 | 0.53 | 0.351 | 0.27 | 0.55 |
| HCol-Ade180Sur-08 | RDgCol07<br>06A0618 | 2007.6 Alive | 2015.7     | 97 |      | F | 64 | No | I-II   | 5x5x1cm                    | 25    | 0 | T4b N0 M0 2C | 0.5482 | 0.66 | 0.53 | 0.348 | 0.36 | 0.46 |
| HCol-Ade180Sur-08 | RDgCol08<br>03A0966 | 2008.3 Alive | 2015.7     | 88 |      | M | 67 | No | I-II   | 9.5x6x2cm                  | 114   | 0 | T2 N0 M0 1   | 0.5988 | 0.72 | 0.53 | 0.392 | 0.43 | 0.57 |
| HCol-Ade180Sur-08 | RDgCol07<br>09A0647 | 2007.7 Dead  | 2013/11/17 | 76 |      | F | 66 | No | I-III  | ①7x5x2cm<br>②5x4x<br>0.5cm | 80    | 1 | N1aM0 3      | 0.5656 | 0.69 | 0.53 | 0.376 | 0.39 | 0.56 |

|                   |                     |              |            |     |      |   |    |       |        |                               |       |    |                |        |      |      |       |      |      |
|-------------------|---------------------|--------------|------------|-----|------|---|----|-------|--------|-------------------------------|-------|----|----------------|--------|------|------|-------|------|------|
| HCol-Ade180Sur-04 | RDgCol07<br>04A0464 | 2007.3 Alive | 2012/8/16  | 65  | 2013 | M | 67 | No    | II     | 15x13x<br>11cm                | 2145  | 0  | T3 N0 M0 2A    | 0.4616 | 0.43 | 0.53 | 0.272 | 0.2  | 0.35 |
| HCol-Ade180Sur-04 | RDgCol06<br>11A0309 | 2006.9 Dead  | 2008/11/3  | 26  |      | M | 83 | No    | II     | 7.5x5x2cm                     | 75    | 2  | T4b N1b M0 3C  | 0.8046 | 0.93 | 0.53 | 0.398 | 0.4  | 0.52 |
| HCol-Ade180Sur-08 | RDgCol08<br>01A0882 | 2007-1 Dead  | 2008/12/11 | 12  |      | M | 65 | No    | II-III | 5x2x1.2cm                     | 12    |    | T3 N0 M0 2A    | 0.508  | 0.74 | 0.53 | 0.336 | 0.31 | 0.47 |
| HCol-Ade180Sur-08 | RDgCol08<br>02A0936 | 2008.1 Alive | 2015.7     | 90  |      | F | 81 | No    | I-II   | 4.8x3.5x<br>1.5cm             | 25.2  | 0  | T2 N0 M0 1     | 0.3729 | 0.44 | 0.54 | 0.328 | 0.34 | 0.51 |
| HCol-Ade180Sur-04 | RDgCol07<br>05A0536 | 2007.4 Alive | 2012/8/16  | 64  | 2013 | M | 67 | No    | II-III | 12x11x5cm                     | 660   | 0  | T4b N0 M0 2A   | 0.6016 | 0.85 | 0.54 | 0.324 | 0.28 | 0.4  |
| HCol-Ade180Sur-08 | RDgCol08<br>01A0887 | 2007-1 Dead  | 2010/8/14  | 32  |      | M | 73 | No    | II     | 7x4x1.8cm                     | 50.4  | 0  | T4a N0 M0 2B   | 0.563  | 0.7  | 0.54 | 0.367 | 0.42 | 0.53 |
| HCol-Ade180Sur-04 | RDgCol07<br>05A0538 | 2007.4 Dead  | 2011/12/1  | 56  |      | M | 74 | No    | I-II   | 4x3x1.5cm,<br>2.8x2x2cm       | 29.2  | 0  | T3 N0 M0 2A    | 0.6496 | 0.86 | 0.54 | 0.52  | 0.67 | 0.68 |
| HCol-Ade180Sur-08 | RDgCol07<br>06A0620 | 2007.6 Dead  | 2008/4/24  | 10  |      | M | 57 | No    | II     | 3x2x1cm                       | 6     | 1  | T4b N1a M0 3C  | 0.5696 | 0.71 | 0.55 | 0.334 | 0.34 | 0.49 |
| HCol-Ade180Sur-04 | RDgCol06<br>09A0280 | 2006.7 Alive | 2015.7     | 108 |      | F | 81 | No    | II     | 9x7x3cm                       | 189   |    | T3 N0 M0 2A    | 0.7827 | 0.84 | 0.56 | 0.319 | 0.32 | 0.47 |
| HCol-Ade180Sur-08 | RDgCol08<br>04A0987 | 2008.4 Dead  | 2012/7/15  | 51  |      | F | 70 | Liver | II     | 5x4x3cm                       | 60    | 5  | T4b N2a M1ε 4A | 0.582  | 0.71 | 0.56 | 0.401 | 0.46 | 0.52 |
| HCol-Ade180Sur-08 | RDgCol08<br>04A0980 | 2008.3 Alive | 2015.7     | 88  |      | F | 73 | No    | II     | 6.5x5x<br>1.5cm               | 48.75 | 0  | T3 N0 M0 2A    | 0.6309 | 0.77 | 0.56 | 0.429 | 0.48 | 0.58 |
| HCol-Ade180Sur-08 | RDgCol07<br>11A0771 | 2007.9 Alive | 2015.7     | 94  |      | M | 63 | No    | II     | 5x4x1cm                       | 20    | 0  | T3 N0 M0 2A    | 0.6055 | 0.73 | 0.56 | 0.37  | 0.38 | 0.52 |
| HCol-Ade180Sur-08 | RDgCol08<br>01A0886 | 2007-1 Alive | 2015.7     | 91  |      | F | 61 | No    | I-II   | 5x4x1cm                       | 20    | 0  | T3 N0 M0 2A    | 0.6244 | 0.75 | 0.57 | 0.251 | 0.29 | 0.38 |
| HCol-Ade180Sur-08 | RDgCol07<br>10A0680 | 2007.9 Dead  | 2008/6/19  | 9   |      | F | 72 | No    | III    | 3x3x1cm                       | 9     | 3  | T3 N1b M0 3B   | 0.6008 | 0.74 | 0.57 | 0.241 | 0.24 | 0.3  |
| HCol-Ade180Sur-04 | RDgCol07<br>01A0404 | 2007.1 Dead  | 2007/7/13  | 6   |      | M | 80 | No    | III    | 9x8x7cm                       | 504   | 0  | T4b N0 M0 2C   | 0.5033 | 0.77 | 0.57 | 0.404 | 0.4  | 0.14 |
| HCol-Ade180Sur-08 | RDgCol08<br>04A0986 | 2008.4 Dead  | 2013/1/10  | 57  |      | F | 75 | No    | II     | 7x4x1.5cm                     | 42    | 0  | T3 N0 M0 2A    | 0.6355 | 0.78 | 0.57 | 0.361 | 0.38 | 0.54 |
| HCol-Ade180Sur-08 | RDgCol07<br>12A0831 | 2007-1 Alive | 2015.7     | 91  |      | F | 75 | No    | II     | 6x4x1.5cm                     | 36    | 0  | T3 N0 M0 2A    | 0.6187 | 0.76 | 0.58 | 0.417 | 0.45 | 0.58 |
| HCol-Ade180Sur-08 | RDgCol07<br>10A0674 | 2007.9 Dead  | 2008/7/28  | 10  |      | M | 76 | No    | II     | 6x3.5x<br>1.5cm               | 31.5  | 3  | T3 N1b M0 3B   | 0.6407 | 0.78 | 0.58 | 0.384 | 0.41 | 0.55 |
| HCol-Ade180Sur-08 | RDgCol07<br>06A0623 | 2007.6 Alive | 2015.7     | 97  |      | F | 60 | No    | II     | 5x4x1cm                       | 20    | 2  | T3 N1b M0 3B   | 0.6209 | 0.77 | 0.59 | n/a   | n/a  | 0.13 |
| HCol-Ade180Sur-04 | RDgCol07<br>06A0576 | 2007.5 Alive | 2015.7     | 98  |      | F | 54 | No    | II     | 4x4x1cm                       | 16    | 0  | T3 N0 M0 2A    | 0.5672 | 0.6  | 0.59 | 0.371 | 0.55 | 0.63 |
| HCol-Ade180Sur-04 | RDgCol07<br>04A0454 | 2007.3 Alive | 2012/8/16  | 65  | 2013 | M | 73 | No    | II-III | 4.5x3.5x<br>1.5cm             | 23.63 | 0  | T3 N0 M0 2A    | 0.6107 | 0.7  | 0.59 | 0.222 | 0.15 | 0.4  |
| HCol-Ade180Sur-04 | RDgCol07<br>04A0444 | 2007.2 Dead  | 2008/11/5  | 21  |      | F | 62 | No    | II     | 4x3x2.5cm,<br>2.5x2x<br>1.5cm | 37.5  | 12 | T3 N2b M0 3C   | 0.7027 | 0.86 | 0.59 | 0.344 | 0.37 | 0.5  |
| HCol-Ade180Sur-04 | RDgCol07<br>05A0528 | 2007.4 Alive | 2015.7     | 99  |      | M | 78 | No    | I-III  | 2.7x2.5x<br>2cm               | 13.5  | 0  | T1 N0 M0 1     | 0.4385 | 0.37 | 0.6  | 0.463 | 0.62 | 0.4  |

|                   |                     |              |            |     |   |    |       |        |                               |       |   |              |        |      |      |       |      |      |
|-------------------|---------------------|--------------|------------|-----|---|----|-------|--------|-------------------------------|-------|---|--------------|--------|------|------|-------|------|------|
| HCol-Ade180Sur-04 | RDgCol07<br>06A0596 | 2007.5 Alive | 2015.7     | 98  | F | 64 | No    | I      | 5x5x1.5cm                     | 37.5  | 1 | T3 N1aM0 3B  | 0.5715 | 0.56 | 0.6  | 0.317 | 0.26 | 0.5  |
| HCol-Ade180Sur-08 | RDgCol08<br>02A0941 | 2008.1 Dead  | 2011/10/8  | 45  | M | 54 | No    | II     | 3x3x1cm                       | 9     | 1 | T3 N1aM0 3B  | 0.3185 | 0.38 | 0.6  | 0.029 | 0.02 | 0.11 |
| HCol-Ade180Sur-04 | RDgCol07<br>05A0540 | 2007.4 Alive | 2015.7     | 99  | F | 54 | No    | II-III | 4x3.5x1cm                     | 14    | 1 | T4a N1aM0 3B | 0.6297 | 0.73 | 0.6  | 0.45  | 0.56 | 0.52 |
| HCol-Ade180Sur-04 | RDgCol07<br>05A0529 | 2007.4 Alive | 2015.7     | 99  | F | 77 | No    | II     |                               |       | 0 | T3 N0 M0 2A  | 0.6779 | 0.86 | 0.61 | 0.368 | 0.44 | 0.54 |
| HCol-Ade180Sur-04 | RDgCol07<br>04A0459 | 2007.3 Alive | 2015.7     | 100 | M | 65 | No    | II     | 5.5x3x<br>0.8cm               | 13.2  | 0 | T3 N0 M0 2A  | 0.7582 | 0.97 | 0.62 | 0.329 | 0.47 | 0.47 |
| HCol-Ade180Sur-04 | RDgCol07<br>06A0587 | 2007.5 Dead  | 2012/10/17 | 65  | M | 87 | No    | I      | 4.5x4x2cm                     | 36    | 0 | T3 N0 M0 2A  | 0.4113 | 0.36 | 0.62 | 0.307 | 0.3  | 0.46 |
| HCol-Ade180Sur-08 | RDgCol07<br>10A0669 | 2007.8 Dead  | 2008/6/15  | 10  | F | 61 | No    | II     | 6x4.5x<br>1.5cm               | 40.5  | 8 | T3 N2bM0 3C  | 0.6475 | 0.78 | 0.62 | 0.414 | 0.43 | 0.57 |
| HCol-Ade180Sur-04 | RDgCol07<br>04A0455 | 2007.3 Dead  | 2011/4/9   | 49  | F | 78 | No    | II     | 3.5x3x1cm                     | 10.5  | 1 | T3 N1aM0 3B  | 0.6663 | 0.65 | 0.62 | 0.47  | 0.44 | 0.46 |
| HCol-Ade180Sur-04 | RDgCol07<br>04A0445 | 2007.2 Alive | 2015.7     | 101 | F | 62 | No    | II     | 15x10x<br>10cm, 2x2x<br>1.5cm | 1506  | 0 | — N0 — —     | 0.633  | 0.64 | 0.64 | 0.595 | 0.84 | 0.64 |
| HCol-Ade180Sur-04 | RDgCol06<br>09A0291 | 2006.9 Alive | 2015.7     | 106 | F | 62 | No    | II-III | 7.5x5x2cm                     | 75    | 0 | T3 N0 M0 2A  | 0.6934 | 0.81 | 0.65 | 0.33  | 0.33 | 0.4  |
| HCol-Ade180Sur-04 | RDgCol06<br>09A0288 | 2006.8 Dead  | 2009/2/12  | 30  | F | 58 | No    | II-III | 5x4x1.5cm                     | 30    | 4 | T3 N2aM0 3B  | 0.7092 | 0.85 | 0.7  | 0.466 | 0.47 | 0.55 |
| HCol-Ade180Sur-04 | RDgCol06<br>09A0277 | 2006.7 Alive | 2015.7     | 108 | M | 62 | No    | II     | 4x3.5x<br>1.5cm               | 21    | 0 | T3 N0 M0 2A  | 0.7658 | 0.79 | 0.7  | 0.581 | 0.58 | 0.62 |
| HCol-Ade180Sur-04 | RDgCol07<br>06A0593 | 2007.5 Dead  | 2010/3/29  | 34  | M | 84 | No    | II     | 9x8x3cm                       | 216   | 0 | T3 N0 M0 2A  | 0.7152 | 0.82 | 0.7  | 0.385 | 0.33 | 0.61 |
| HCol-Ade180Sur-04 | RDgCol06<br>09A0289 | 2006.8 Dead  | 2007/1/25  | 5   | M | 72 | No    | I-III  | 4x2.5x2cm                     | 20    |   | T3 N0 M0 2A  | 0.5695 | 0.79 | 0.71 | 0.315 | 0.32 | 0.09 |
| HCol-Ade180Sur-04 | RDgCol06<br>11A0311 | 2006.9 Dead  | 2008/10/16 | 25  | F | 52 | No    | II     | 5x4x2.5cm                     | 50    | 6 | T3 N2aM0 3B  | 0.7023 | 0.66 | 0.71 | 0.511 | 0.51 | 0.48 |
| HCol-Ade180Sur-04 | RDgCol06<br>09A0293 | 2006.9 Dead  | 2011/11/27 | 62  | F | 75 | No    | II     | 4.5x3x<br>1.5cm               | 20.25 | 2 | T3 N1bM0 3B  | 0.6471 | 0.66 | 0.72 | 0.528 | 0.53 | 0.61 |
| HCol-Ade180Sur-04 | RDgCol07<br>06A0591 | 2007.5 Alive | 2015.7     | 98  | F | 75 | No    | II     | 7x4x1cm                       | 28    | 0 | T3 N0 M0 2A  | 0.7822 | 0.85 | 0.74 | 0.578 | 0.61 | 0.69 |
| HCol-Ade180Sur-04 | RDgCol07<br>06A0577 | 2007.5 Dead  | 2008/4/29  | 11  | M | 76 | No    | II     | 3.5x3x1cm,<br>7x6x3cm         | 136.5 | 0 | T3 N0 M0 2A  | 0.6904 | 0.84 | 0.74 | 0.469 | 0.49 | 0.58 |
| HCol-Ade180Sur-04 | RDgCol07<br>05A0526 | 2007.4 Dead  | 2008/9/19  | 17  | M | 73 | Liver | I      | 5.5x4.5x<br>2.5cm             | 61.88 | 1 | T1 N1aM1ε 4A | 0.6279 | 0.69 | 0.75 | 0.249 | 0.62 | 0.44 |
| HCol-Ade180Sur-04 | RDgCol07<br>06A0583 | 2007.5 Dead  | 2009/9/3   | 28  | M | 64 | No    | II-III | 5.5x4x<br>2.5cm               | 55    | 0 | T3 N0 M0 2A  | 0.6629 | 0.68 | 0.75 | 0.541 | 0.7  | 0.58 |
| HCol-Ade180Sur-04 | RDgCol06<br>09A0281 | 2006.7 Dead  | 2009/2/17  | 31  | M | 70 | No    | II     | 6x5.5x1, 7x<br>5x0.5cm        | 50.5  |   | T3 N0 M0 2A  | 0.8426 | 0.94 | 0.78 | 0.43  | 0.43 | 0.57 |
| HCol-Ade180Sur-04 | RDgCol07<br>06A0590 | 2007.5 Alive | 2015.7     | 98  | F | 58 | No    | II     | 3.5x2x<br>1.5cm               | 10.5  |   | T3 N0 M0 2A  | 0.8155 | 0.93 | 0.79 | 0.488 | 0.62 | 0.61 |
| HCol-Ade180Sur-08 | RDgCol08<br>04A0982 | 2008.3 Alive | 2015.7     | 88  | M | 58 | No    | II     | 6x5x1.5cm                     | 45    | 0 | T3 N0 M0 2A  | n/a    | n/a  | n/a  | 0.416 | 0.46 | 0.53 |



**Table S2: Correlation between the mRNA expressions of COL5A2 and clinicopathological variables in patients with colorectal cancer revealed by dataming of Oncomine gene array datasets.**

| variables             | Dataset <sup>a</sup>               | Total cases                  | COL5A2 mRNA |          | $\chi^2$   | p          |  |
|-----------------------|------------------------------------|------------------------------|-------------|----------|------------|------------|--|
|                       |                                    |                              | < median    | > median |            |            |  |
| <b>Dukes Stage</b>    | <b>Jorissen Colorectal 3 (154)</b> |                              |             |          |            |            |  |
|                       |                                    | Dukes Stage A                | 24          | 19       | 5          | 13.2 0.004 |  |
|                       |                                    | Dukes Stage B                | 54          | 29       | 25         |            |  |
|                       |                                    | Dukes Stage C                | 43          | 15       | 28         |            |  |
|                       |                                    | Dukes Stage D                | 33          | 14       | 19         |            |  |
|                       |                                    | <b>Bittner Colon (373)</b>   |             |          |            |            |  |
|                       | Dukes Stage A                      |                              | 30          | 19       | 3.99 0.046 |            |  |
|                       | Dukes Stage B, C, D                |                              | 85          | 103      |            |            |  |
| <b>T stage</b>        | <b>Bittner Colon (373)</b>         |                              |             |          |            |            |  |
|                       |                                    | Tis, T1-T2                   | 70          | 43       | 27         | 5.22 0.022 |  |
|                       |                                    | T3-T4                        | 248         | 114      | 134        |            |  |
|                       |                                    | <b>TCGA Colorectal (237)</b> |             |          |            |            |  |
|                       | T1-T2                              | 53                           | 33          | 20       | 4.18 0.041 |            |  |
|                       | T3                                 | 144                          | 66          | 78       |            |            |  |
| <b>Stage</b>          | <b>Tsukamoto Colorectal (104)</b>  |                              |             |          |            |            |  |
|                       |                                    | Stage I-II                   | 50          | 20       | 30         | 3.85 0.05  |  |
|                       |                                    | Stage III-IV                 | 54          | 32       | 22         |            |  |
| <b>Gender</b>         | <b>Gaedcke Colorectal (130)</b>    |                              |             |          |            |            |  |
|                       |                                    | Female                       | 21          | 15       | 6          | 5.3 0.021  |  |
|                       |                                    | Male                         | 44          | 18       | 26         |            |  |
|                       |                                    | <b>Tsuji Colorectal (83)</b> |             |          |            |            |  |
|                       |                                    | Female                       | 29          | 19       | 10         | 3.97 0.046 |  |
|                       |                                    | Male                         | 54          | 23       | 31         |            |  |
| <b>KRAS status</b>    | <b>Gaedcke Colorectal (130)</b>    |                              |             |          |            |            |  |
|                       |                                    | Wild Type                    | 35          | 13       | 22         | 5.63 0.018 |  |
|                       |                                    | Mutation                     | 30          | 20       | 10         |            |  |
| <b>Microsatellite</b> | <b>Watanabe Colon (84)</b>         |                              |             |          |            |            |  |
|                       |                                    | Microsatellite Stable        | 51          | 31       | 20         | 6.04 0.014 |  |
|                       |                                    | Microsatellite Instable      | 33          | 11       | 22         |            |  |
| <b>Recurrence</b>     | <b>Jorissen Colorectal 3 (154)</b> |                              |             |          |            |            |  |
|                       |                                    | No Recurrence                | 27          | 8        | 19         | 6.54 0.011 |  |
|                       |                                    | Recurrence                   | 92          | 53       | 39         |            |  |

<sup>a</sup>The analysis was performed using datasets from the Oncomine cancer gene expression microarray DB (<https://www.oncomine.org/resource/login.html>). The total case numbers are shown in the brackets.

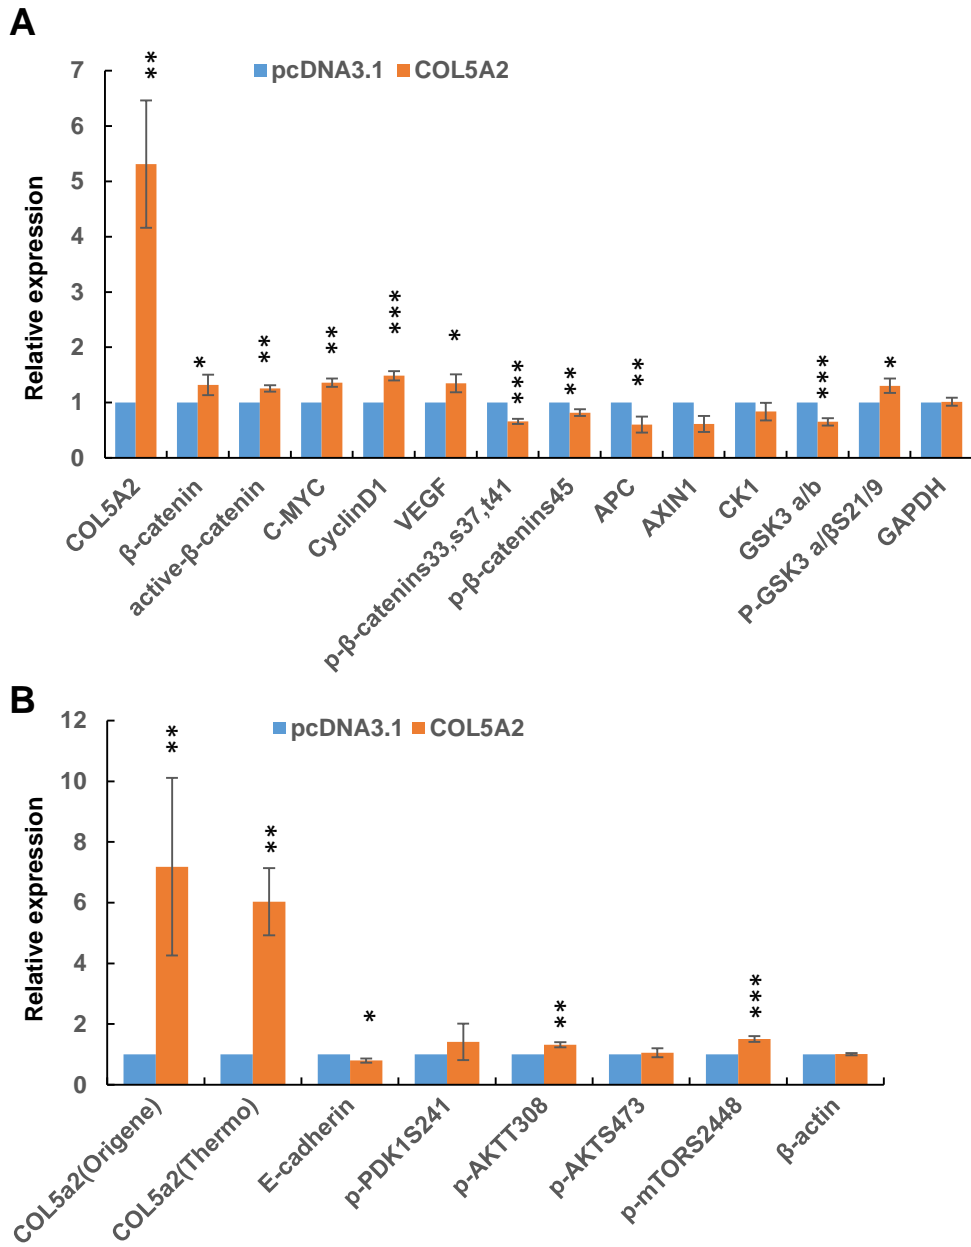

**Figure S1. Statistic analysis of Western blot densitometry of figure 4B and C.** The expressions in 293FT, SW620 and HCT116 were treated as biological replicates. The control was normalized to 1. The significance of the fold change was calculated with the Student's t test. A p value < 0.05 was considered as statistically significant. \* means < 0.05. \*\* means < 0.01. \*\*\* means < 0.001.

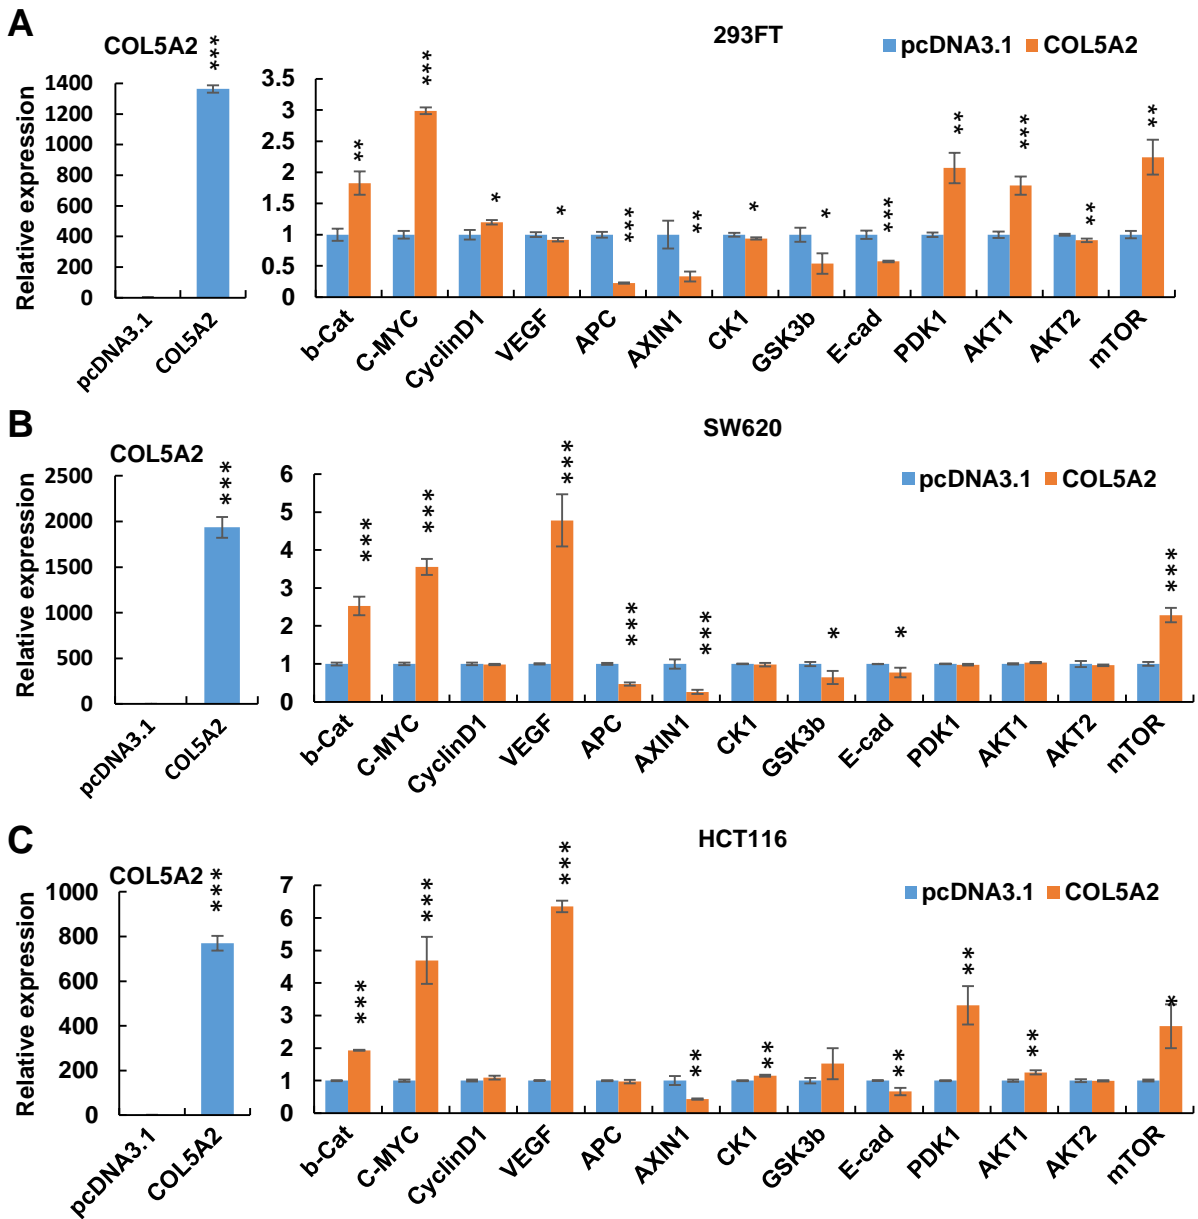

**Figure S2. mRNA expression changes of the molecules of WNT/ $\beta$ -catenin and PI3K/AKT pathways by COL5A2 ectopic expression.** COL5A2 was overexpressed in 293FT (A), SW620 (B) and HCT116 (C) cells and the mRNA expressions of selected genes were measured with qPCR. The significance of the fold change was calculated with the Student's t test. A p value < 0.05 was considered as statistically significant. \* means < 0.05. \*\* means < 0.01. \*\*\* means < 0.001.

**A**

Cancer Tissue #1

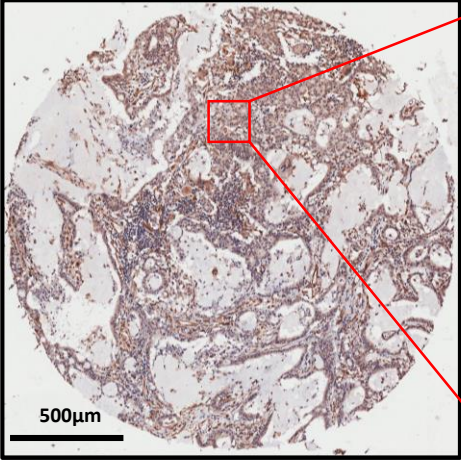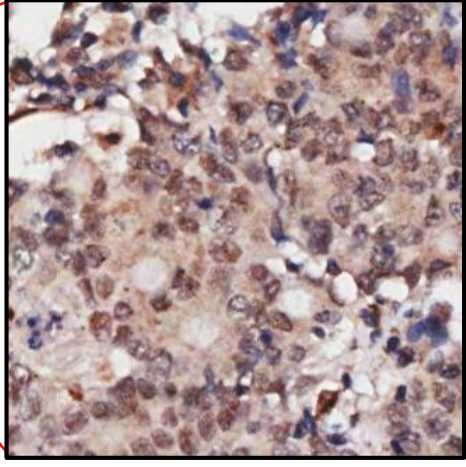

Cancer Tissue #3

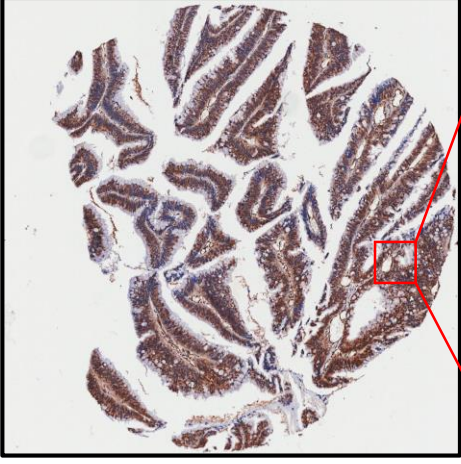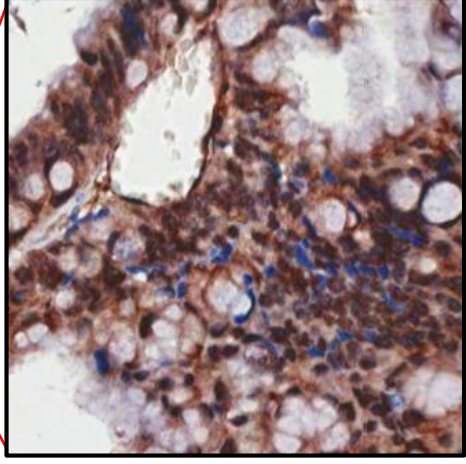

Cancer Tissue #2

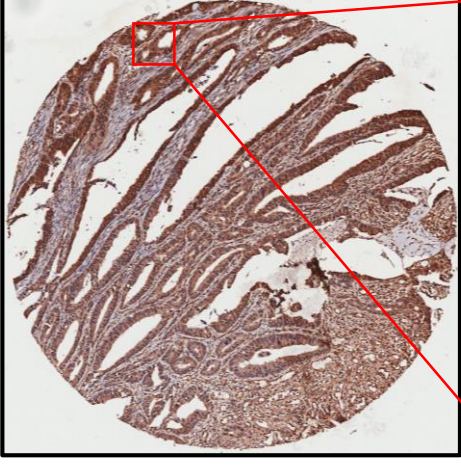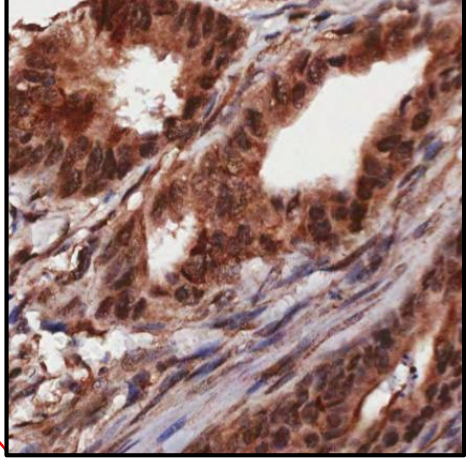

Cancer Tissue #4

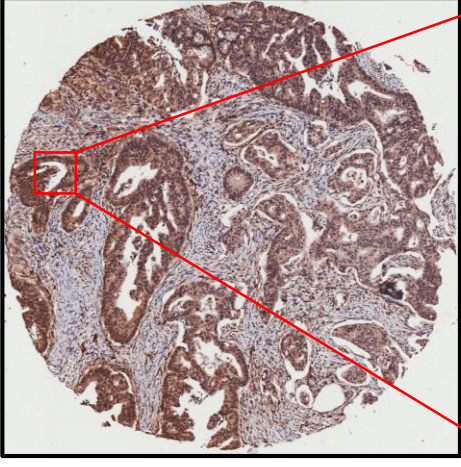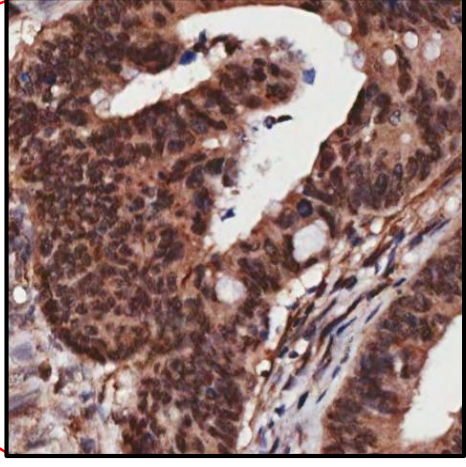

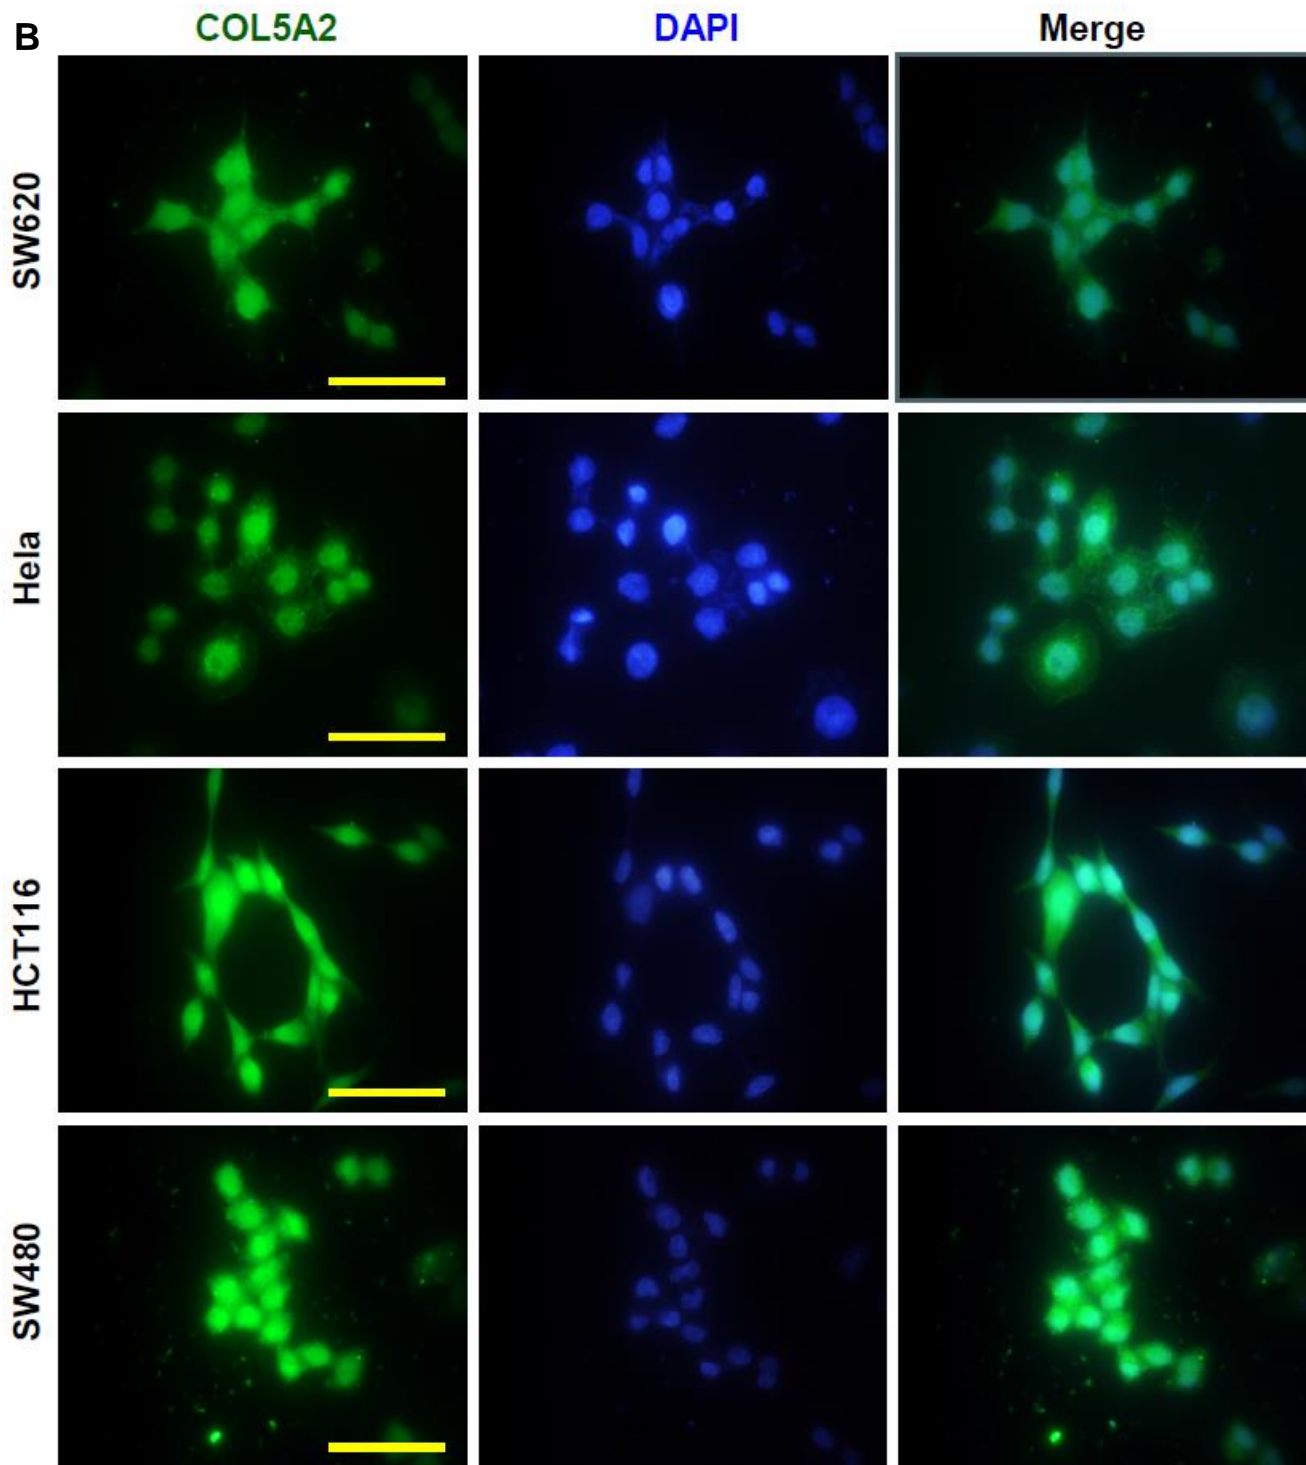

**Figure S3. Nuclear localization of COL5A2.**

A Immunohistochemistry analysis was performed using commercial tissue microarrays. Nuclear localization of COL5A2 in CRC tissue. The bar represents 500  $\mu\text{m}$ .

B Immunofluorescence analysis of COL5A2 in SW620, HCT116, SW480 and Hela cells. The bar represents 50  $\mu\text{m}$ .
